# Supplementary material for: Synthesis of Porous CoFe2O4 and Its Application as a Peroxidase Mimetic for Colorimetric Detection of H2O2 and Organic Pollutant Degradation
Source: MDPI journal article supplement (doi:10.3390/nano8070451), 2018-06-21
Supplement: s1 [file s1]

## Supplementary Material

# Synthesis of porous $\text{CoFe}_2\text{O}_4$ and its application as peroxidase mimetics for colorimetric detection of $\text{H}_2\text{O}_2$ and organic pollutants degradation

Lihong Wu<sup>1</sup>, Gengping Wan<sup>1</sup>, Na Hu<sup>2</sup>, Zhengyi He<sup>1</sup>, Shaohua Shi<sup>1</sup>, Yourui Suo<sup>2</sup>, Kan Wang<sup>1</sup>, Xuefei Xu<sup>1</sup>, Yulin Tang<sup>1</sup> and Guizhen Wang<sup>1,\*</sup>

<sup>1</sup> Key Laboratory of Advanced Materials of Tropical Island Resources (Hainan University), Ministry of Education, Haikou 570228, China

<sup>2</sup> Key Laboratory of Tibetan Medicine Research, Northwest Institute of Plateau Biology, Chinese Academy of Sciences, Xining 810001, China

\* Correspondence: [wanguizhen@hainu.edu.cn](mailto:wanguizhen@hainu.edu.cn); [wanguizhen0@hotmail.com](mailto:wanguizhen0@hotmail.com); Tel.: +86-0898-66268172.

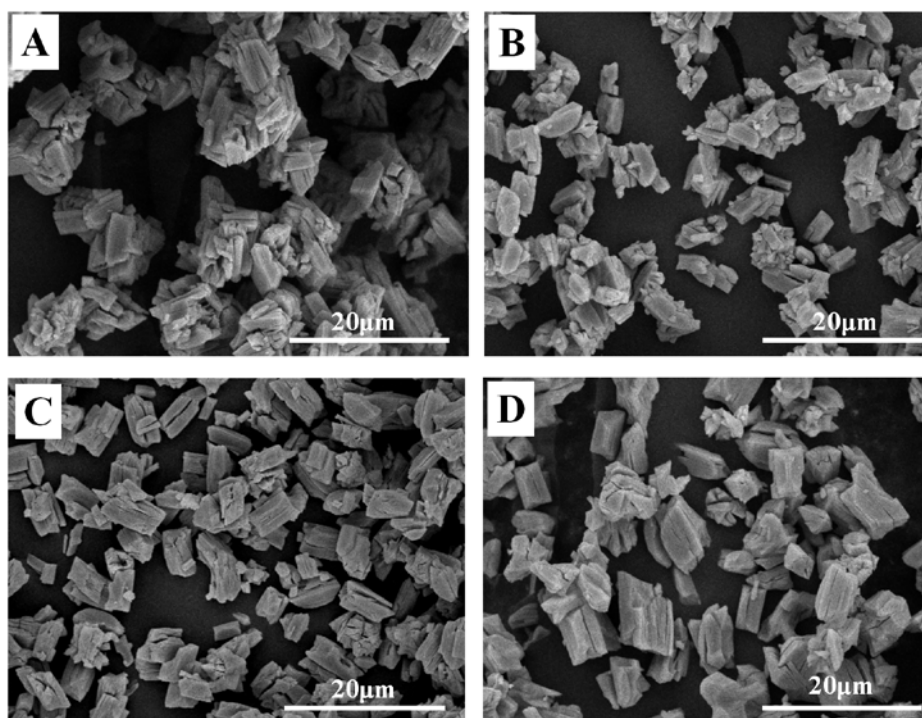

**Figure S1.** SEM images of CF400 (A), CF500 (B), CF600 (C) and CF700 (D).

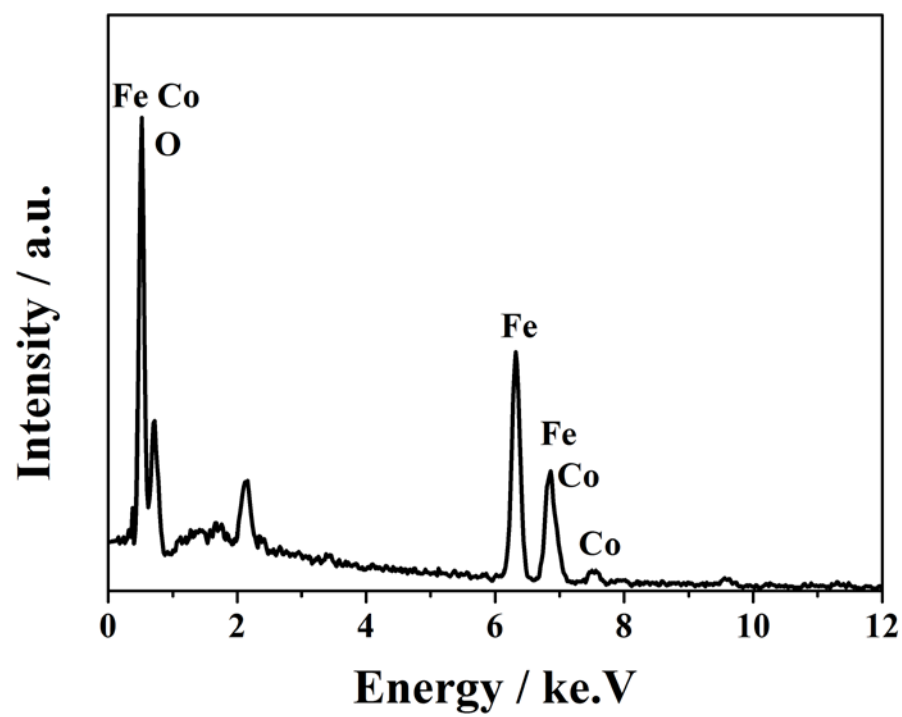

Figure S2. The EDX spectrum of CF300.

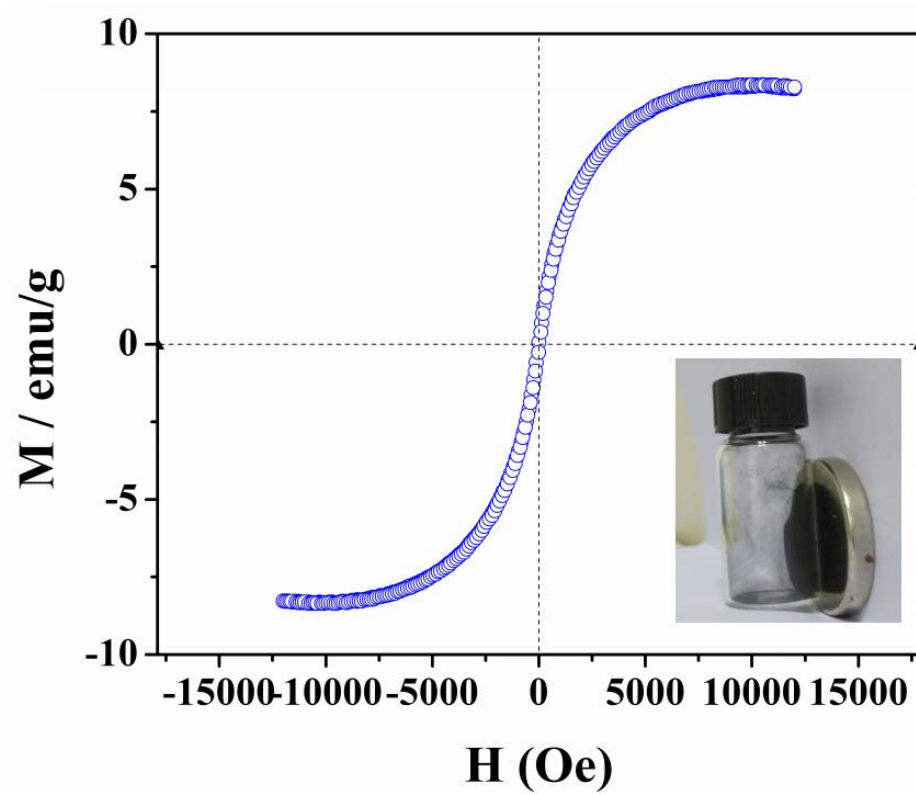

Figure S3. The magnetic hysteresis loop.
